# Supplementary material for: Stem cell derived neurosphere assay highlights the effects of infection on human cortical development
Source: Research Square preprint supplement (doi:10.21203/rs.3.rs-2184467/v1), 2022-10-25
Supplement: Supplementary file 1 [file 2921d832ffe449a2d7f06aef.docx]

**Supplementary Material: Stem cell derived neurosphere assay highlights the effects of infection on human cortical development**


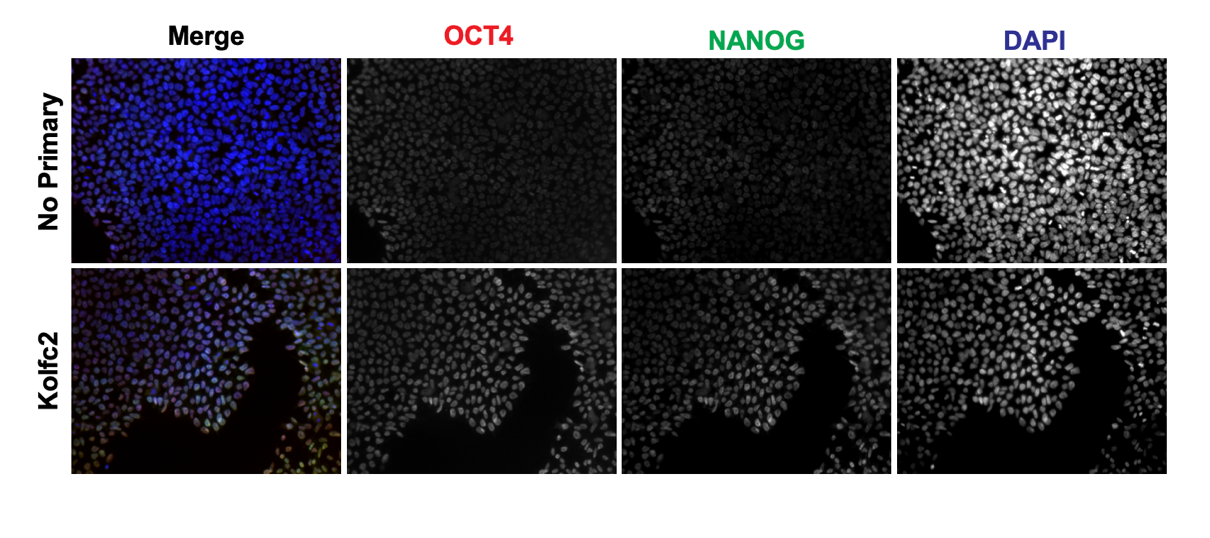


**Supplementary figure 1**: Immunostaining for pluripotency markers *OCT4* and *NANOG* in iPSC line Kolfc2. The bottom panel shows that Top panel does not contain the primary antibodies.


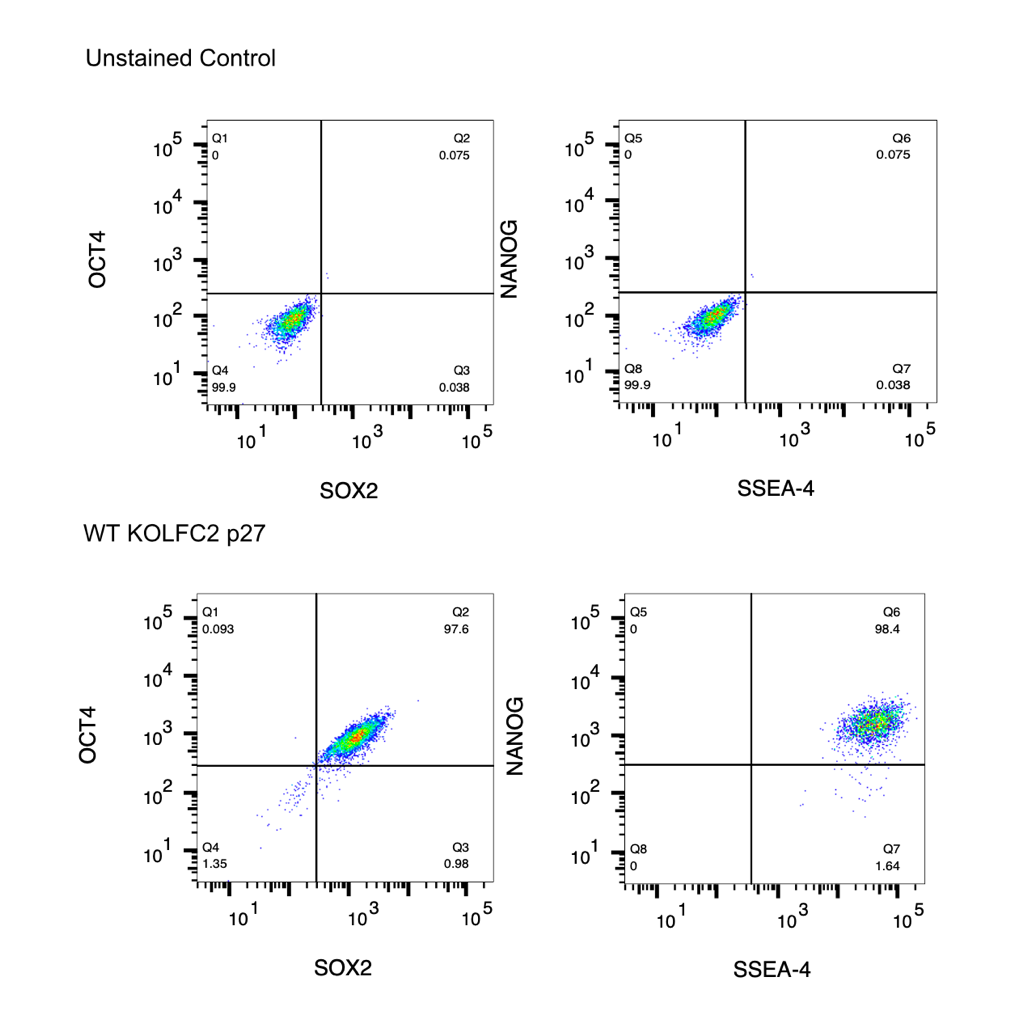


**Supplementary figure 2:** Flow cytometry analysis of iPSCs stained with antibodies for pluripotency markers. The iPSC line Kolfc2 expresses pluripotency markers OCT4, SOX2, NANOG and SSEA-4.

**Supplementary table 1:** Neuronal Maintenance Medium

| Component | Final Concentration | Supplier | Catalogue no. |
| --- | --- | --- | --- |
| DMEM/F12 | 1 X | Thermo Fisher/Gibco | 10565018 |
| N2 supplement | 1 X | Thermo Fisher/Gibco | 17502048 |
| Insulin | 5µg/ml | Sigma-Aldrich | I9278 |
| GlutaMAXTM | 1 X | Thermo Fisher/Gibco | 35050061 |
| Non-essential amino acids | 1 X | Thermo Fisher/Gibco | 11140050 |
| 2-mercaptoethanol | 100µM | Thermo Fisher/Gibco | 21985023 |
| Sodium Pyruvate | 1mM | Sigma | P4562 |
| B27 supplement | 1 X | Thermo Fisher/Gibco | 17504044 |
| Neurobasal medium | 1 X | Thermo Fisher/Gibco | 12348017 |

**Supplementary table 2:** Neural Induction Medium

| Component | Final Concentration | Supplier | Catalogue no. |
| --- | --- | --- | --- |
| Neuronal Maintenance Medium | 1 X |  |  |
| SB431542 | 10µM | Tocris Bioscience | 1614 |
| Dorsomorphin | 1µM | Bio-Techne | 3093/10 |

**Supplementary table 3:** Live cell imaging channel details

| Component | DNA (SPY-555) | Tubulin (SiR) |
| --- | --- | --- |
| Laser | 561nm (8% power) | 640nm (10% power) |
| Exposure time | 150 ms | 200 ms |
| Dichroic | Quad pass 405/488/561/640 | Quad pass 405/488/561/640 |
| Emission filter | Barrier 617/73 | Barrier 685/40 |

**Supplementary table 4:** Fixed cell imaging details

| Component | DAPI - DNA | CTIP2/TBR2 | NESTIN/TUJ1 |
| --- | --- | --- | --- |
| Laser | 405nm (30% power) | 488nm (60% power) | 561 (70% power) |
| Exposure time | 50 ms | 100 ms | 120 ms |
| Dichroic | Quad pass 405/488/561/640 | Quad pass 405/488/561/640 | Quad pass 405/488/561/640 |
| Emission filter | Barrier 447/60 | Barrier 525/50 | Barrier 685/40 |

**Supplementary table 5:** Details of antibodies used in immunofluorescence experiments

| Antibody | Dilution | Supplier | Catalogue no. |
| --- | --- | --- | --- |
| NANOG | 1:800 | Cell Signaling Technology | 3580S |
| OCT4 | 1:200 | Cell Signaling Technology | 75463S |
| PAX6 | 1:200 | Cell Signaling Technology | 60433 |
| NESTIN | 1:1600 | Cell Signaling Technology | 33475 |
| TBR2 | 1:400 | Cell Signaling Technology | 81493 |
| β3-Tubulin | 1:200 | Cell Signaling Technology | 4466 |
| CTIP2 | 1:200 | Cell Signaling Technology | 12120 |
| BRN2 | 1:200 | Cell Signaling Technology | 12137 |

**Supplementary videos 1-3:** Please see separate attachments of video files.
